# Supplementary material for: Toward understanding the genetic basis of adaptation to high-elevation life in poikilothermic species: A comparative transcriptomic analysis of two ranid frogs, Rana chensinensis and R. kukunoris
Source: PubMed Central journal article supplement (PMC3542248; doi:10.1186/1471-2164-13-588), 2012-11-01

**Additional file 1. Characteristics of gene annotation of assembled transcripts against the reference dataset. A.** E-value distribution of blastx hits for each transcript with a cut-off E-value of 1E-5. **B.** Similarity distribution of blastx hits for each transcripts.

**(A) E-value distribution**

- 1 1E-5 to 1E-20
- 2 1E-20 to 1E-50
- 3 1E-50 to 1E-100
- 4 1E-100 to 0
- 5 0

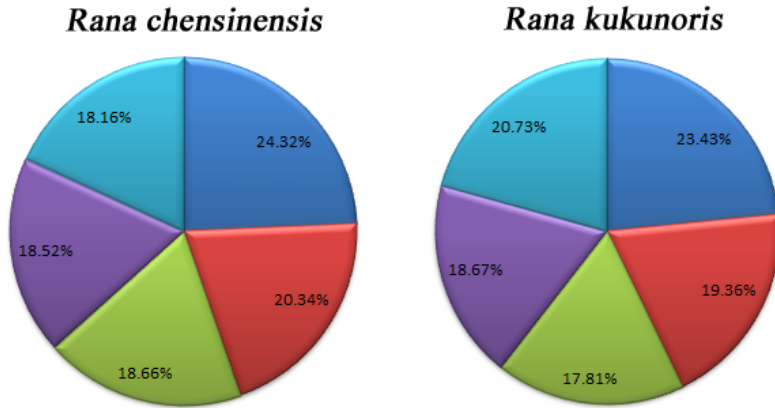

**(B) Similarity distribution**

- 1 <40%
- 2 40% to 60%
- 3 60% to 80%
- 4 80% to 95%
- 5 95% to 100%

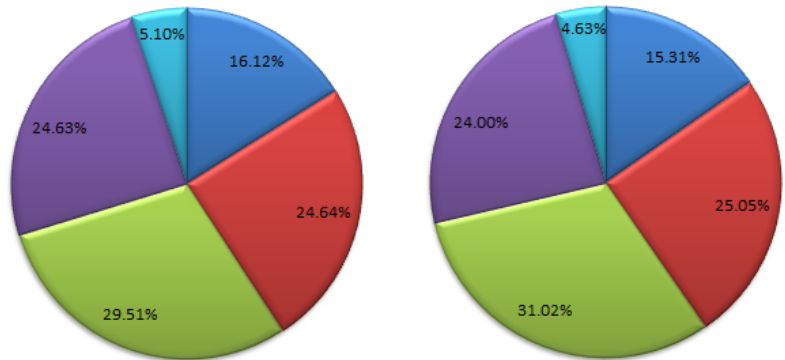

Supplement: 1471-2164-13-588-S1.pdf [file 1471-2164-13-588-S1.pdf]
