# Supplementary material for: Toward understanding the genetic basis of adaptation to high-elevation life in poikilothermic species: A comparative transcriptomic analysis of two ranid frogs, Rana chensinensis and R. kukunoris
Source: PubMed Central journal article supplement (PMC3542248; doi:10.1186/1471-2164-13-588), 2012-11-01

**Additional file 2. Distribution of Gene Ontology (GO) categories (level 2) of transcripts for *Rana chensinensis* and *R. kukunoris*.** The GO functional annotations are summarized in three main categories: cellular component, molecular function and biological process. The red bars and blue bars represent *R. chensinensis* and *R. kukunoris*, respectively.

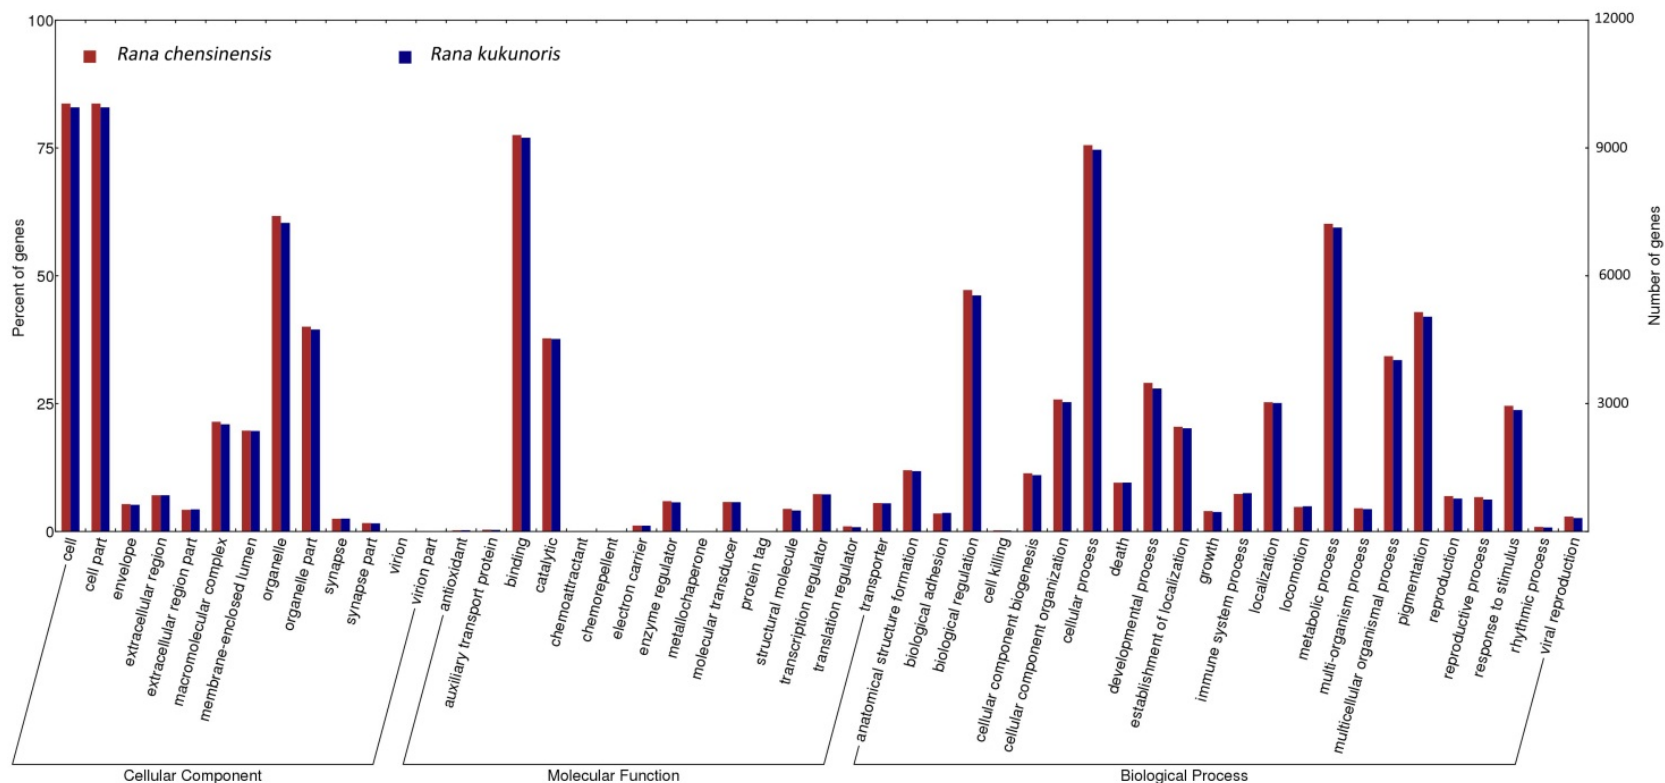

Supplement: 1471-2164-13-588-S2.pdf [file 1471-2164-13-588-S2.pdf]
